# Supplementary material for: National Trends in the Safety Performance of Electronic Health Record Systems From 2009 to 2018
Source: PubMed Central journal article supplement (PMC7260621; doi:10.1001/jamanetworkopen.2020.5547), 2020-05-29
Supplement: jamanetwopen-3-e205547-s001.pdf [file jamanetwopen-3-e205547-s001.pdf]

## Supplementary Online Content

Classen DC, Holmgren AJ, Co Z, et al. National trends in the safety performance of electronic health record systems from 2009 to 2018. *JAMA Netw Open*. 2020;3(5):e205547. doi:10.1001/jamanetworkopen.2020.5547

**eFigure.** Histogram of Number of Years Taken by Hospitals

**eTable.** Descriptive Statistics by EHR Vendor

This supplementary material has been provided by the authors to give readers additional information about their work.

**eFigure.** Histogram of Number of Years Taken by Hospitals

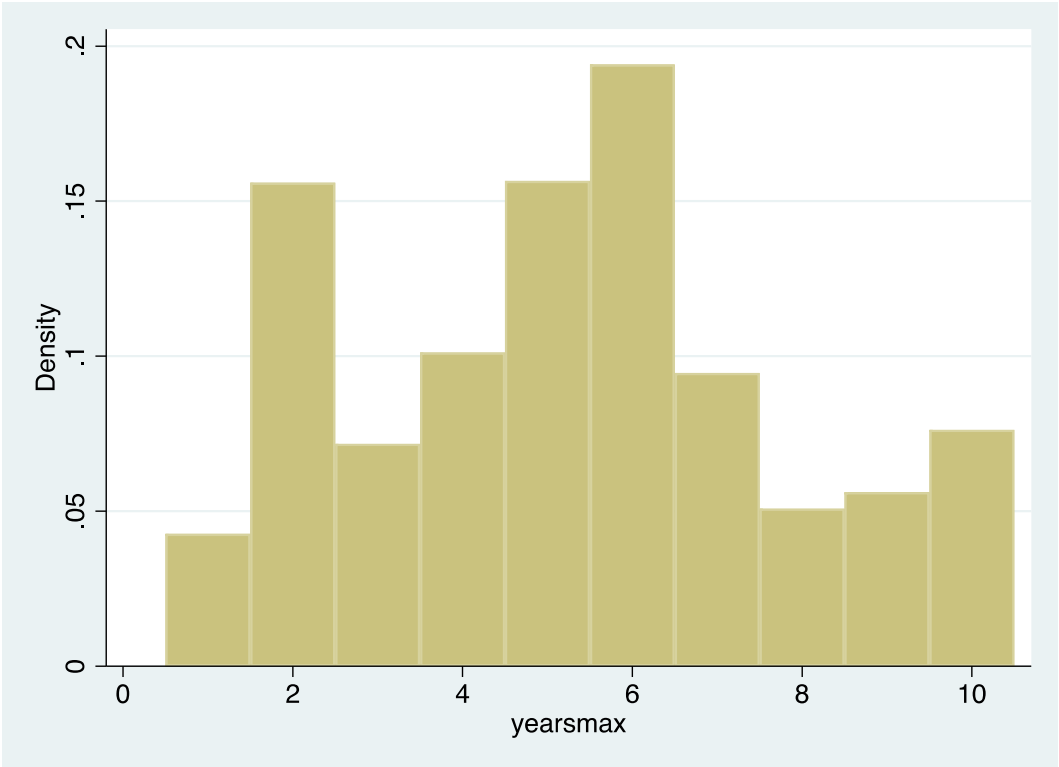

**eTable.** Descriptive Statistics by EHR Vendor

| <b>EHR Vendor</b> | <b>Mean</b> | <b>N</b> | <b>Minimum</b> | <b>Maximum</b> | <b>Standard Deviation</b> |
|-------------------|-------------|----------|----------------|----------------|---------------------------|
| Vendor E          | 55.60       | 352      | 12.77          | 100.00         | 20.37                     |
| Vendor G          | 63.32       | 141      | 17.73          | 97.44          | 18.07                     |
| Vendor B          | 54.51       | 2199     | 0.00           | 100.00         | 17.14                     |
| Vendor A          | 67.40       | 2620     | 0.00           | 100.00         | 12.83                     |
| Vendor D          | 56.52       | 514      | 0.00           | 100.00         | 18.39                     |
| Vendor H          | 60.57       | 111      | 0.00           | 100.00         | 18.98                     |
| Vendor C          | 60.90       | 1996     | 17.14          | 100.00         | 16.07                     |
| Other Vendor      | 56.93       | 386      | 12.77          | 98.58          | 18.39                     |
| Vendor F          | 53.27       | 225      | 13.83          | 100.00         | 15.25                     |
